# Supplementary material
Source: PubMed Central journal article supplement (PMC4362241)
Supplement: JCI69097sd.pdf [file JCI69097sd.pdf]

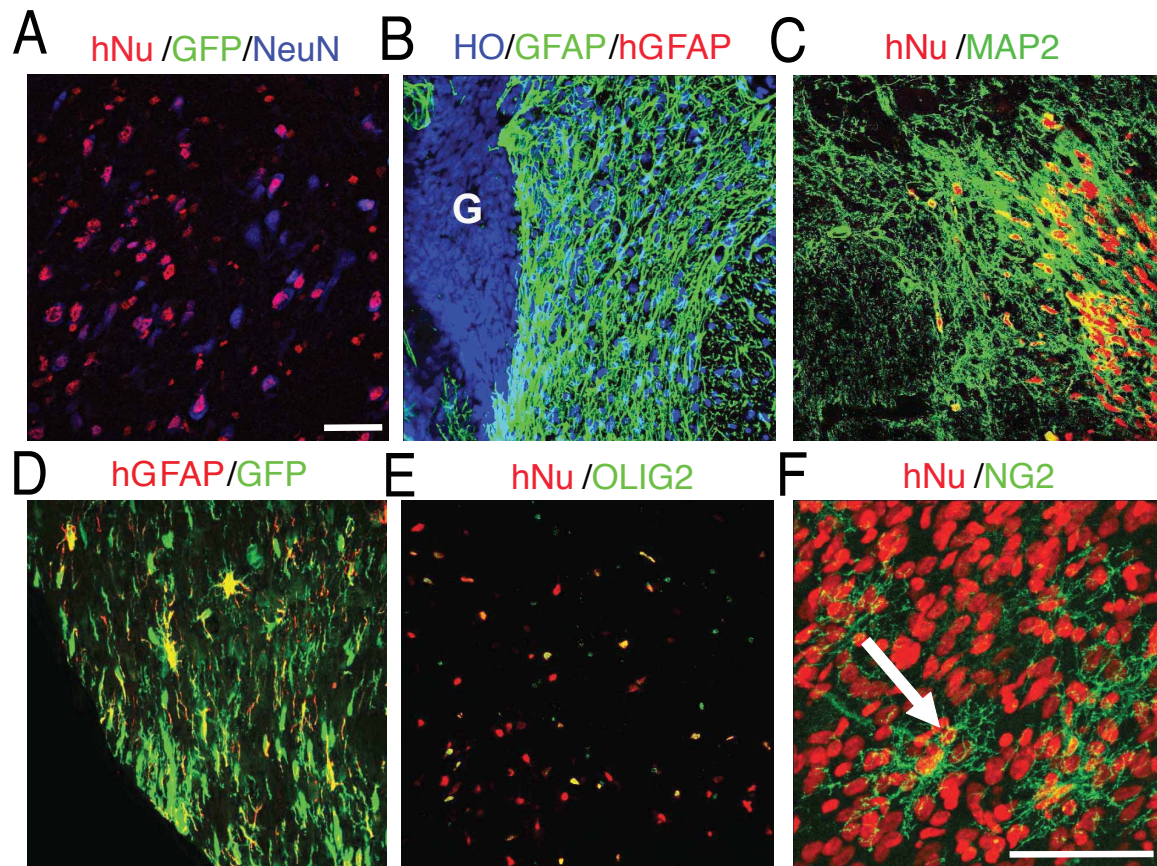

**Supplemental Figure 1.**

(A) Three months post-grafts, GFP was downregulated in human neuron ( $\text{hNu}^+/\text{NeuN}^+$ ). (B) Two weeks post-graft, none of cells in the graft (G) were positive for GFAP or hGFAP. (C) Two weeks post-graft, some of the  $\text{hNu}^+$  cells (from iPSCs) were positive for MAP2. (D) Three months post-graft, human astrocytes ( $\text{hGFAP}^+/\text{GFP}^+$ ) were mostly localized to the edge of the graft bordering the white matter. (E) Three months post-graft, small numbers of  $\text{hNu}^+$  cells were  $\text{olig2}^+$ . (F) Five months post-graft, some of the  $\text{hNu}^+$  cells became  $\text{NG2}^+$ . Scale bar =  $50\mu\text{m}$ .

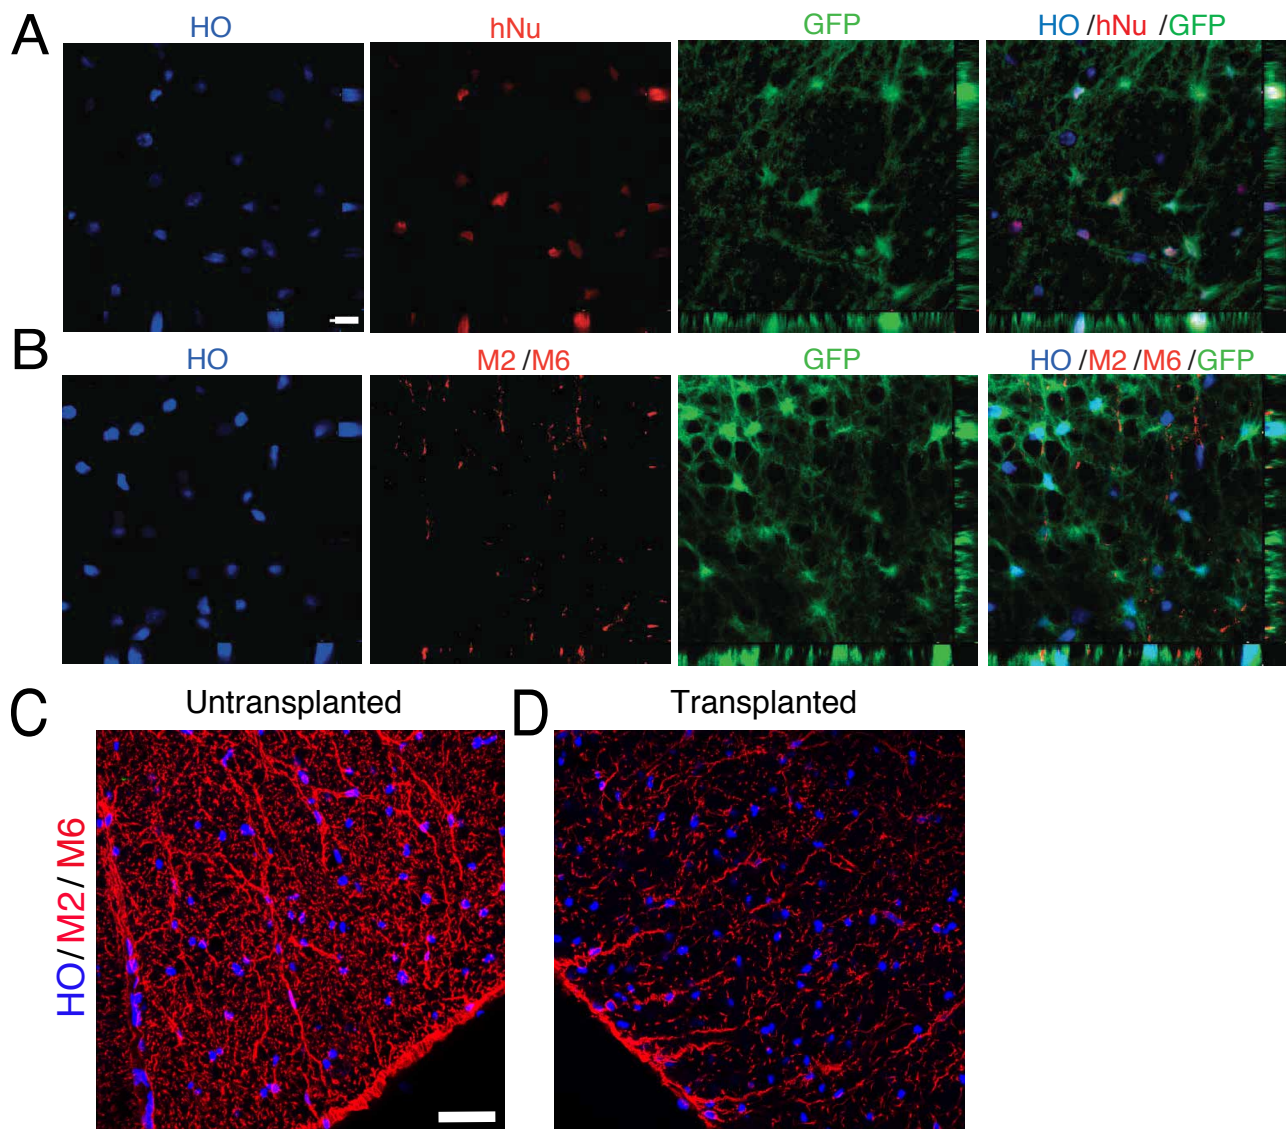

**Supplemental Figure 2.**

(A) Confocal analysis indicated that human (GFP+) cell did not contain additional nuclei besides the hNu+ nucleus. Scale bar = 10  $\mu\text{m}$ . (B) Confocal analysis showed that human (GFP+) cells were not positive for the mouse-specific antibody M2/M6. Scale bar = 10  $\mu\text{m}$ . In the un-transplanted side (C), the M2/M6 fluorescent signal was substantially higher than that in the transplanted sides (D) at 9 months. Scale bar = 10  $\mu\text{m}$ .

A hNu/Casp3/B-tublin

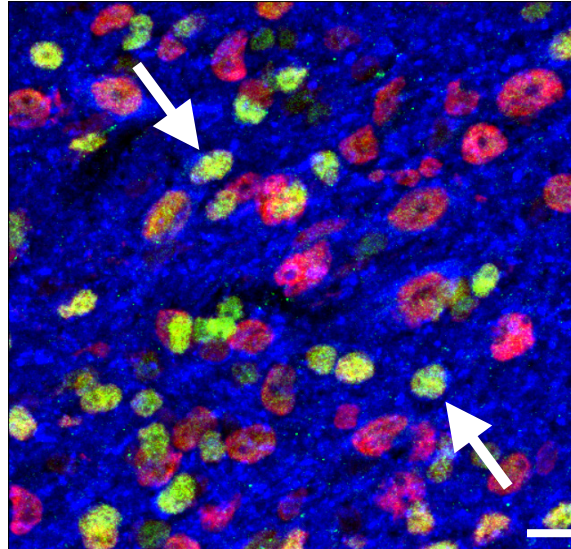

**Supplemental Figure 3**

The  $\beta$ III-tubulin+ human (hNu+) neurons expressed caspase-3 at 5 months. Scale bar = 10 $\mu$ m.

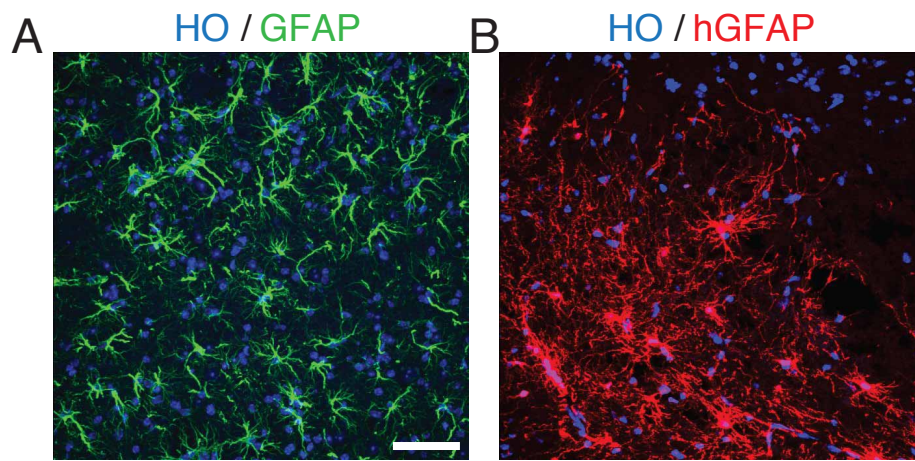

**Supplemental Figure 4**

Morphology of mouse astrocytes in untransplanted areas labeled by a pan-GFAP antibody (A) and human astrocytes stained with a human specific GFAP antibody (B). Scale bar=50 $\mu$ m.

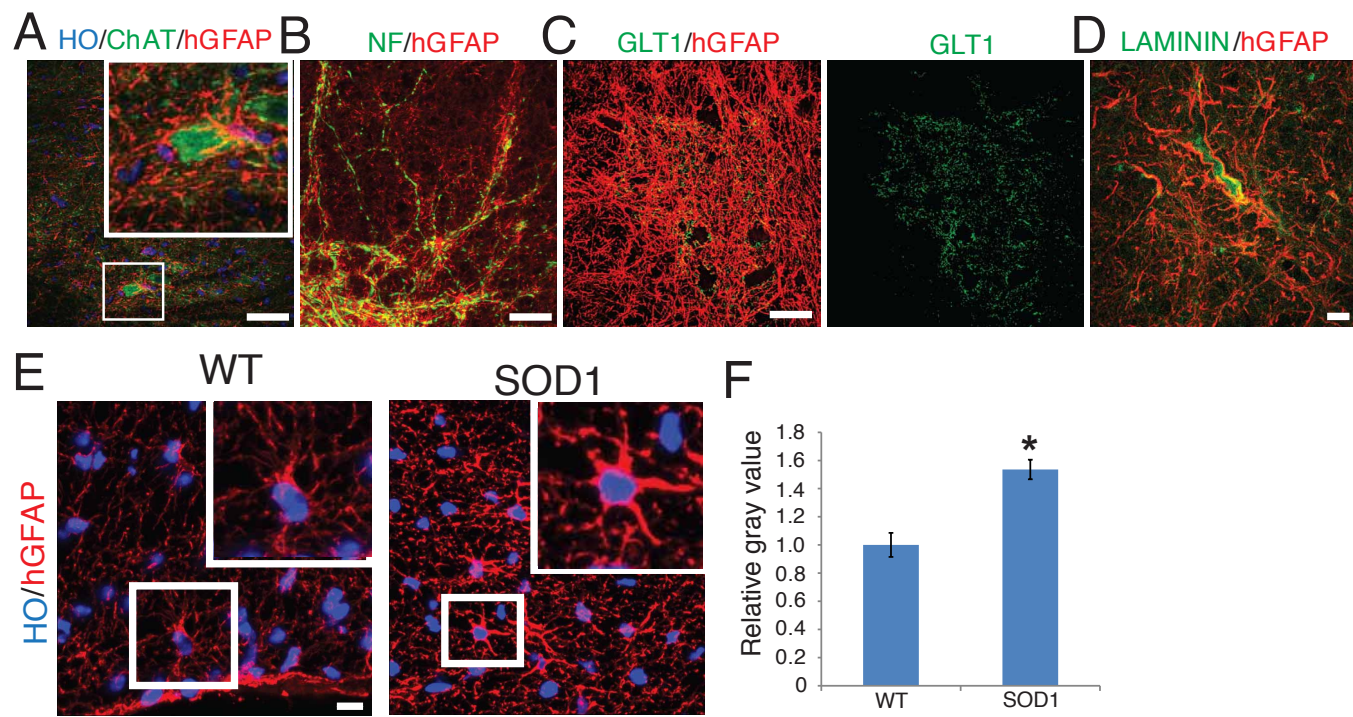

#### Supplemental Figure5

ALS astrocytes structurally integrate into the host tissue. (A) In gray matter, the hGFAP<sup>+</sup> astrocytes (from ALS iPSCs) surround neurons, including ChAT<sup>+</sup> motor neurons (inset). Scale bar = 50 $\mu$ m. (B) In the white matter, the human astrocytes (from ALS iPSCs) extend long processes that line up with the NF<sup>+</sup> axons. Scale bar = 50 $\mu$ m. (C) The intensity of GLT1 staining is higher in the gray matter than in the white matter. Scale bar = 50 $\mu$ m. (D) Human astrocytes (hGFAP<sup>+</sup>) project end feet to the blood vessel. Scale bar = 10 $\mu$ m. (E) Human astrocytes show activated morphology in SOD1 transplanted group. Scale bar=10 $\mu$ m. (F) Relative intensity of human specific GFAP (mean  $\pm$  SEM) is higher in ALS cell-transplanted group than wt group, Significance was assessed by *t* test (n=6, \**P*<0.05).

**Supplemental Table 1. Antibodies (Zhang)**

| <b>Antibody</b>   | <b>Isotype</b>  | <b>Dilution</b> | <b>Source</b>                | <b>Catalog No</b>                                                                                                 |
|-------------------|-----------------|-----------------|------------------------------|-------------------------------------------------------------------------------------------------------------------|
| AQP4              | Rabbit IgG      | 1:500           | Chemicon & Millipore         | AB3594                                                                                                            |
| Capase3           | Rabbit IgG      | 1:500           | Cell Signaling Technology    | 9661                                                                                                              |
| ChAT              | Goat IgG        | 1:300           | Chemicon & Millipore         | AB5964                                                                                                            |
| CX43              | Rabbit IgG      | 1:200           | ZYMED                        | 48-3000                                                                                                           |
| GFAP              | Rabbit IgG      | 1:5,000         | DAKO                         | Z0034                                                                                                             |
| GLT1              | Guinean pig IgG | 1:25000         | Gift from Dr. Jeff Rothstein |                                                                                                                   |
| Human Nuclei      | Mouse IgG       | 1:200           | Chemicon & Millipore         | MAB1281                                                                                                           |
| Ki67              | Rabbit IgG      | 1:500           | ZYMED                        | 18-0191                                                                                                           |
| hGFAP             | Mouse IgG       | 1:500           | Stem Cells, Inc              | AB-123-U-050                                                                                                      |
| Neurofilament 200 | Rabbit IgG      | 1:1000          | Sigma                        | N4142                                                                                                             |
| Tubulin           | Rabbit IgG      | 1:4,000         | Chemicon & Millipore         | AB9354                                                                                                            |
| M2                | Mouse IgG2a     | 1:100           | DSHB, Iowa City, IA          | <a href="http://dshb.biology.uiowa.edu/M2-membrane-protein">http://dshb.biology.uiowa.edu/M2-membrane-protein</a> |
| M6                | Mouse IgG2a     | 1:100           | DSHB, Iowa City, IA          | <a href="http://dshb.biology.uiowa.edu/M6-membrane-protein">http://dshb.biology.uiowa.edu/M6-membrane-protein</a> |
| MAP2              | Rabbit IgG      | 1:5000          | Chemicon & Millipore         | AB5622                                                                                                            |
| NeuN              | Rabbit IgG      | 1:500           | Chemicon & Millipore         | ABN78                                                                                                             |
| NG2               | Rabbit IgG      | 1:500           | Chemicon & Millipore         | AB5320                                                                                                            |
| OLIG2             | Rabbit IgG      | 1:500           | Chemicon & Millipore         | AB9610                                                                                                            |
